# Supplementary material for: Forecasting and identifying the meteorological and hydrological conditions favoring the occurrence of severe hazes in Beijing and Shanghai using deep learning
Source: Copernicus journal article supplement (doi:10.5194/acp-21-13149-2021), 2021-09-06
Supplement: Supplementary file 1 [file acp-21-13149-2021-supplement.pdf]

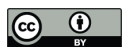

*Supplement of*

**Forecasting and identifying the meteorological and hydrological conditions favoring the occurrence of severe hazes in Beijing and Shanghai using deep learning**

**Chien Wang**

*Correspondence to:* Chien Wang ([chien.wang@aero.obs-mip.fr](mailto:chien.wang@aero.obs-mip.fr))

The copyright of individual parts of the supplement might differ from the article licence.

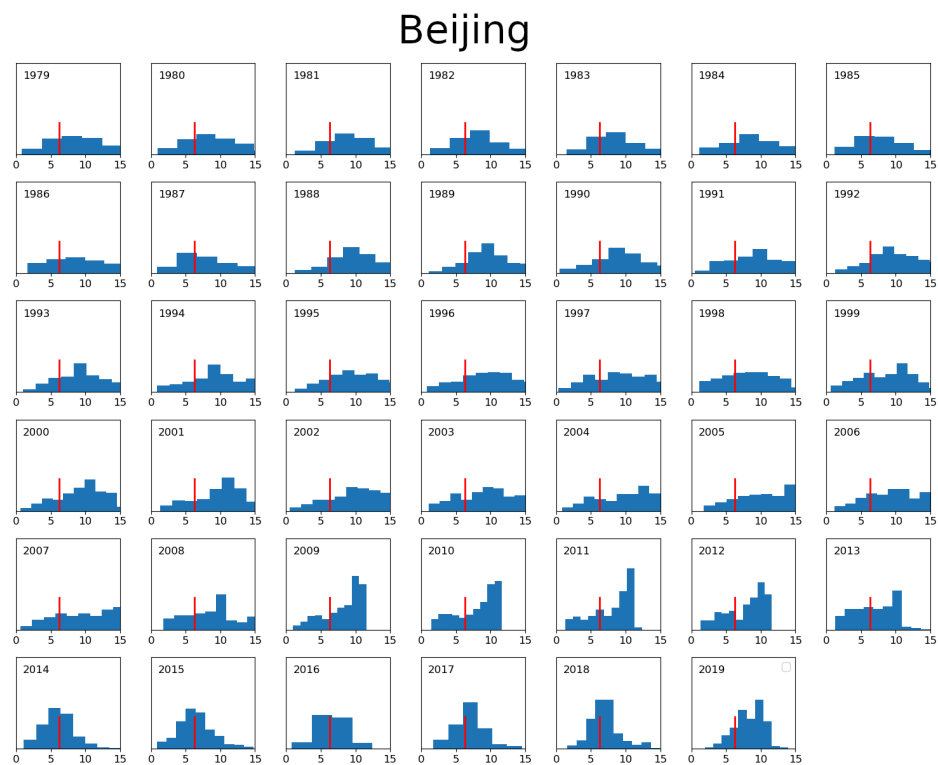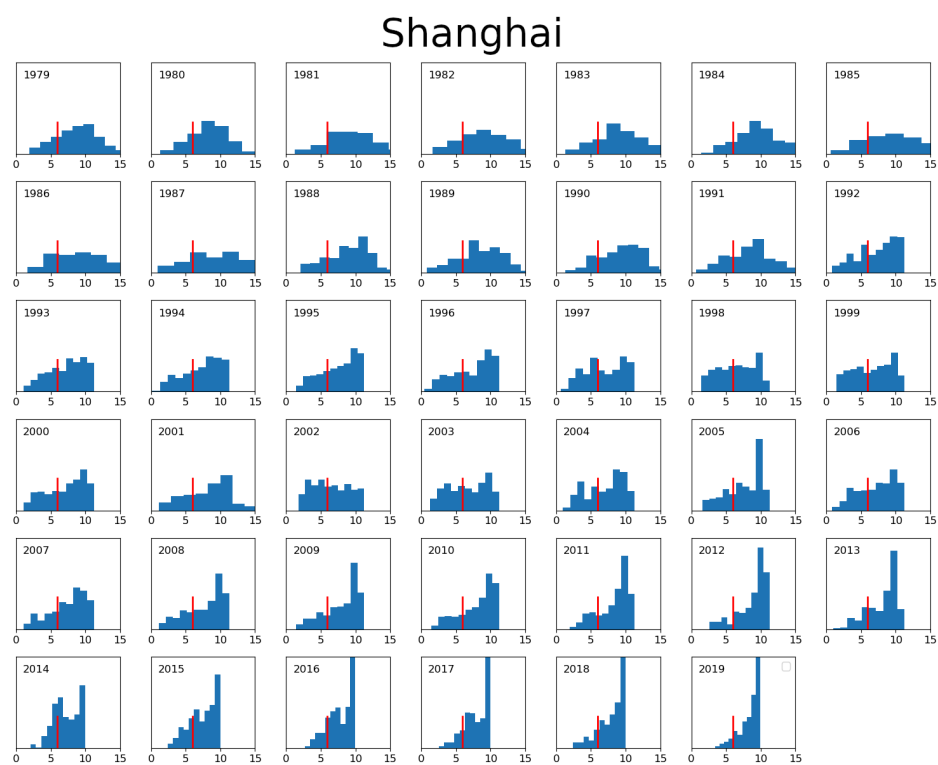

**Figure S1.** Histograms of surface visibility (in km) for each year from 1979 to 2019 of Beijing and Shanghai. Vertical scales of all panels are the same as  $[0, 0.4]$ .

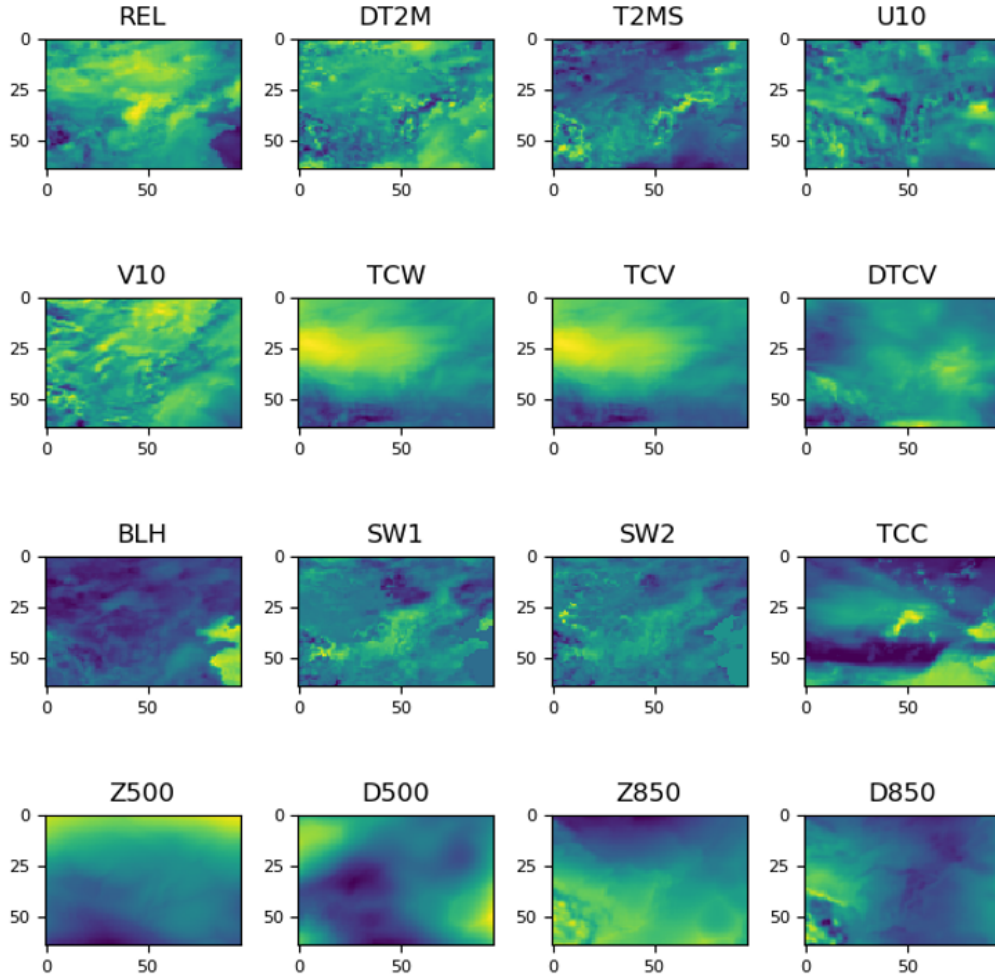

**Figure S2.** Examples of feature maps for Beijing cases, all have been normalized into  $[-1, +1]$  ranges.

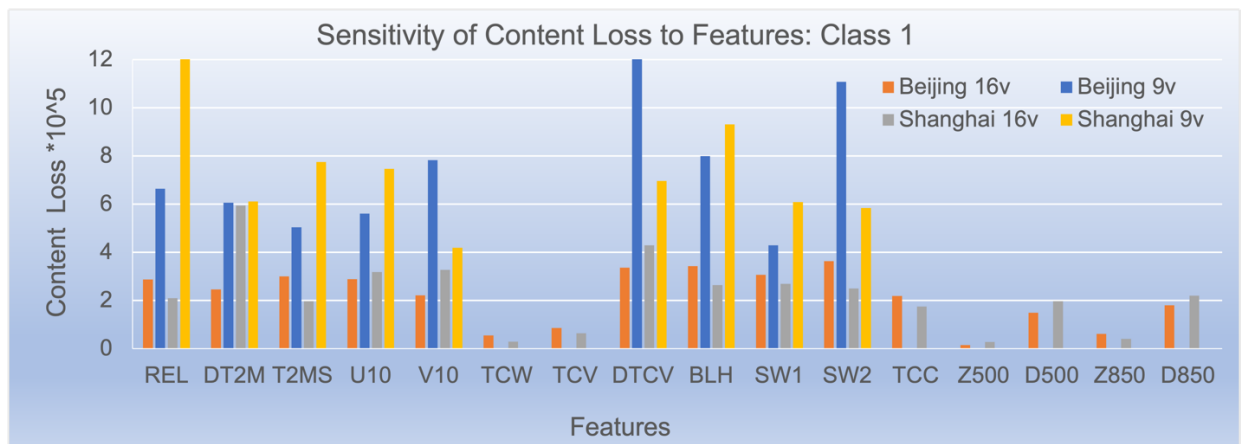

**Figure S3.** Sensitivity of the network output to various features, measured by the content loss in comparing randomly perturbed output with original output in Beijing and Shanghai haze cases. Shown are results for severe haze days, here 16v and 9v represent training with 16 and 9 features, respectively.

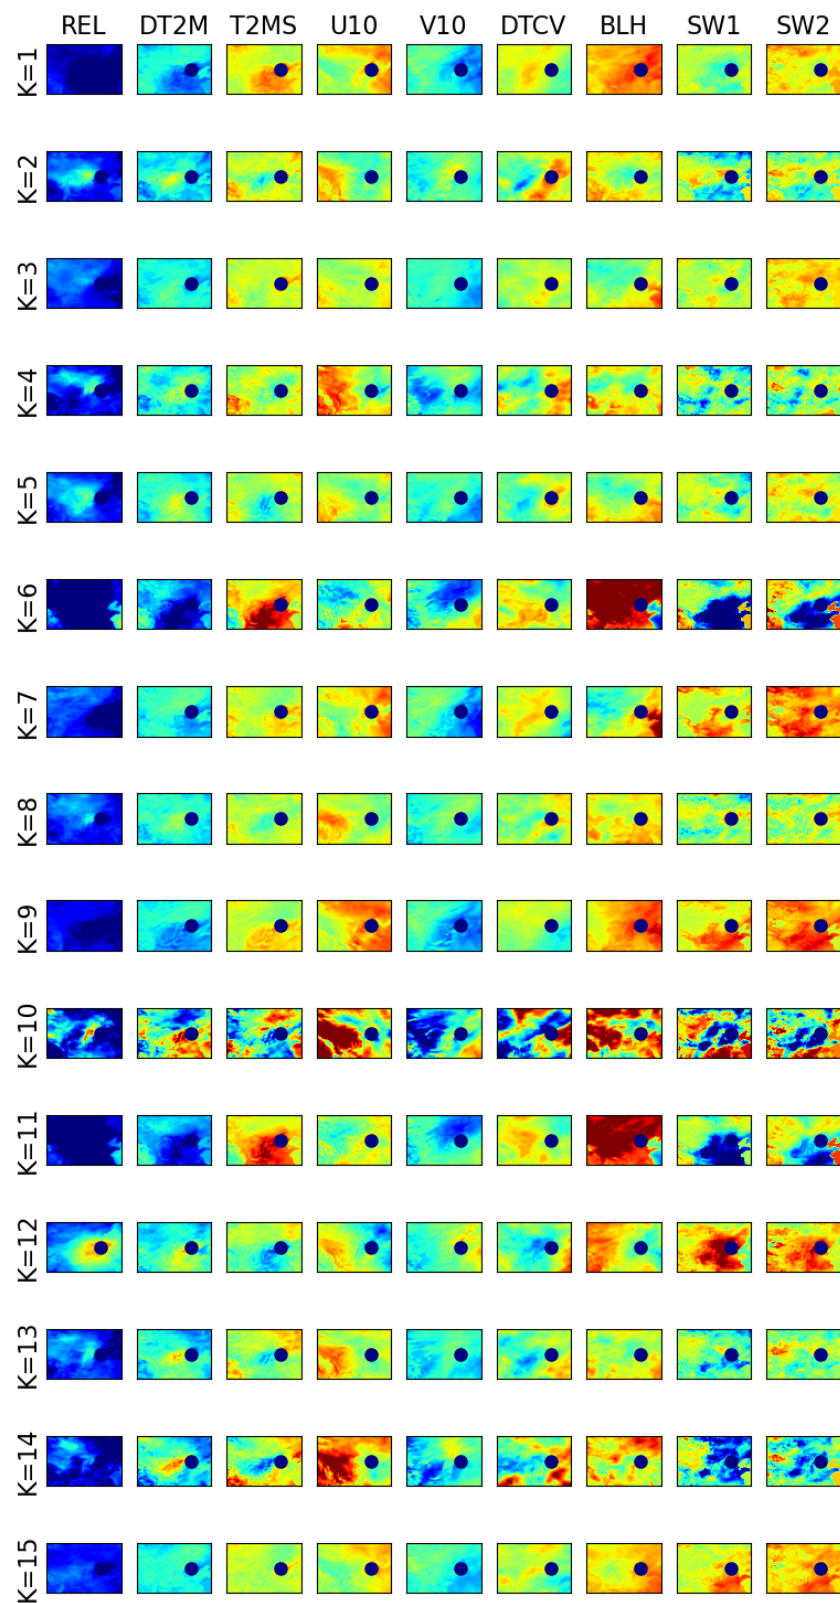

**Figure S4.** Cluster-mean feature maps in normalized format of 15 TN outcome clusters for Beijing (location marked by navy dot) cases.

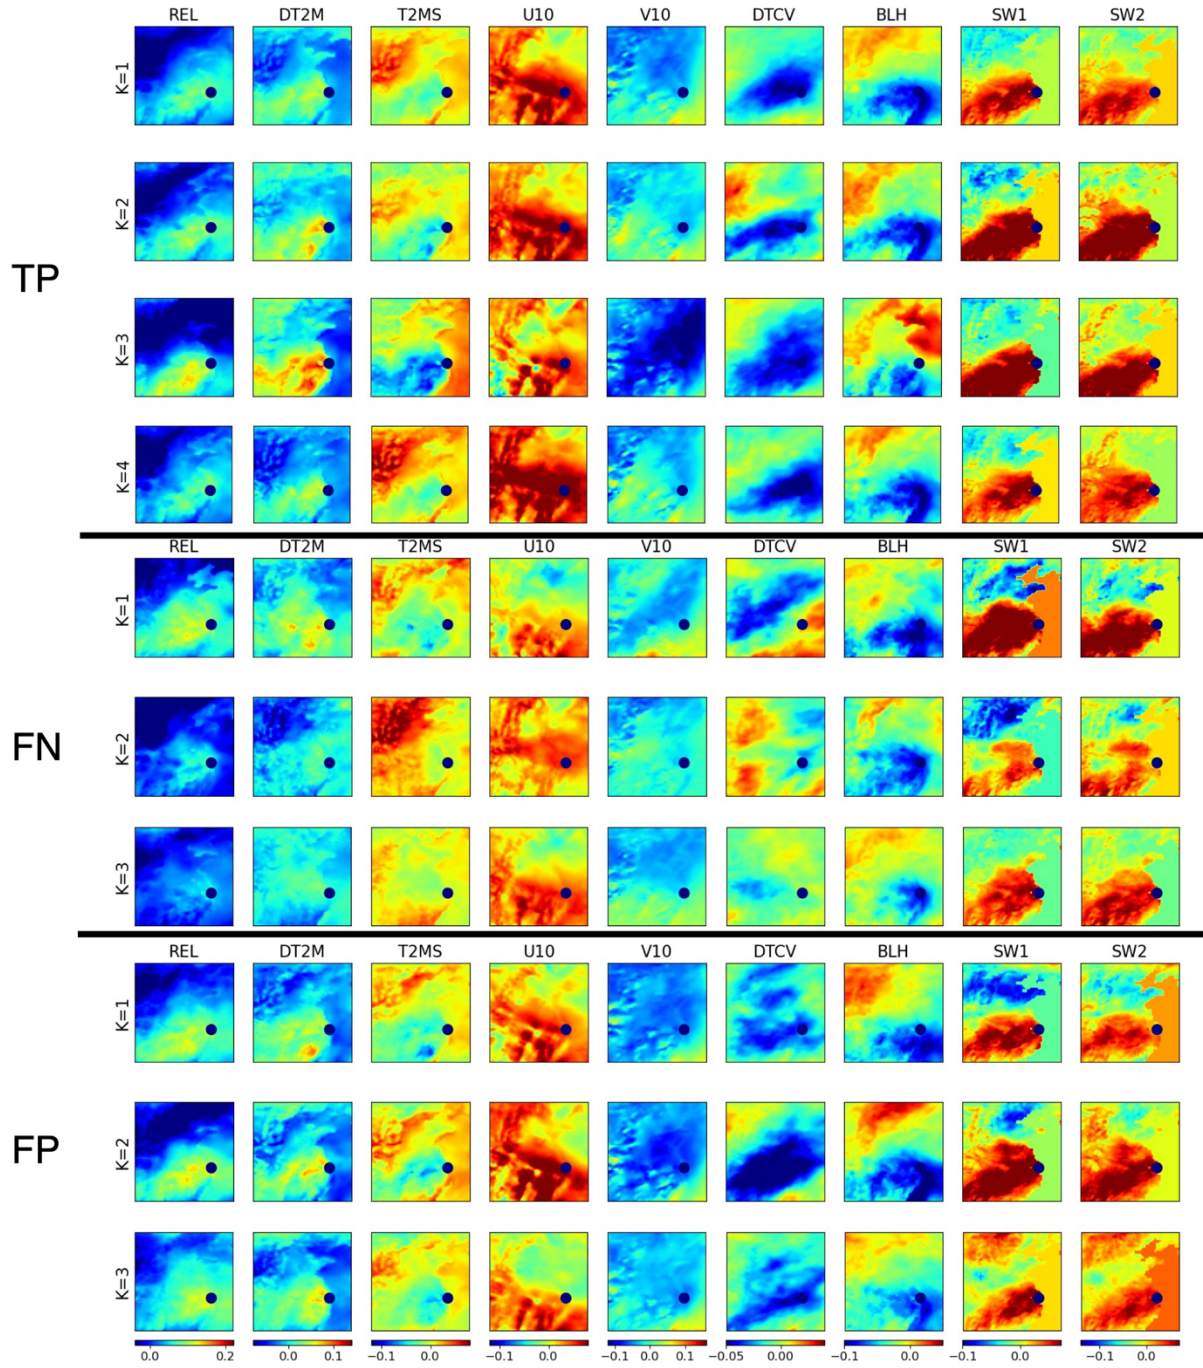

**Figure S5.** Cluster-mean feature maps in normalized format of TP, FN, and FP outcome clusters for Shanghai (location marked by navy dot) cases.



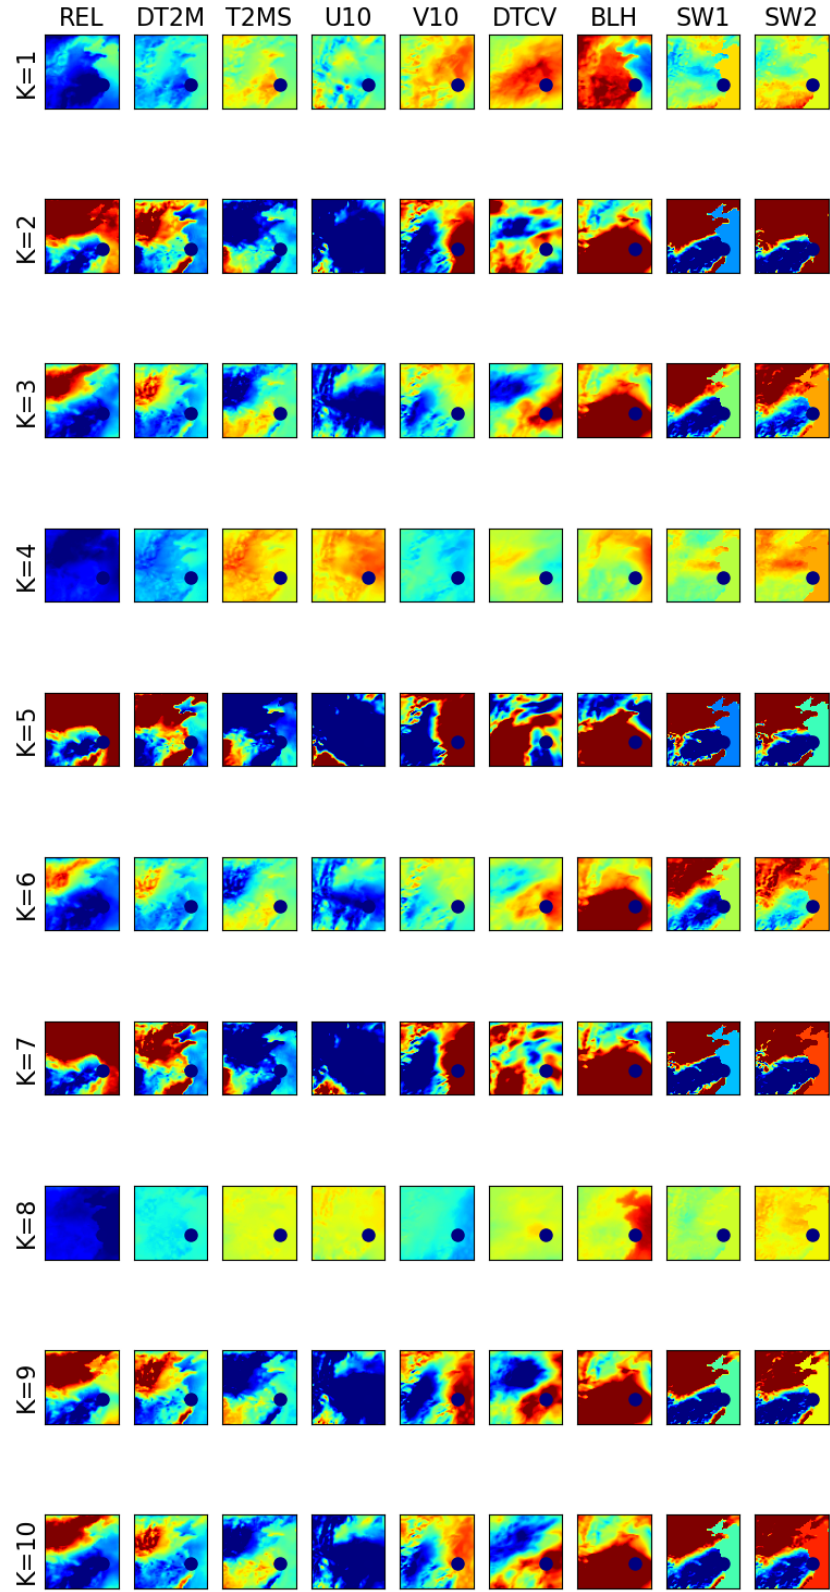

**Figure S6.** Same as Fig. S5 except for 10 TN outcome clusters for Shanghai cases.

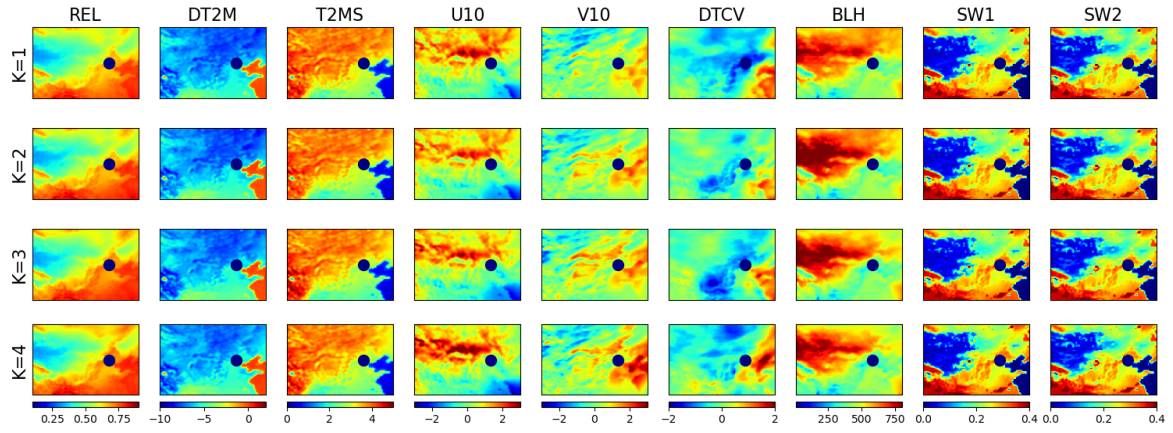

**Figure S7.** Cluster-mean feature maps in unnormalized format of 4 FP clusters for Beijing (location marked by navy dot) cases.

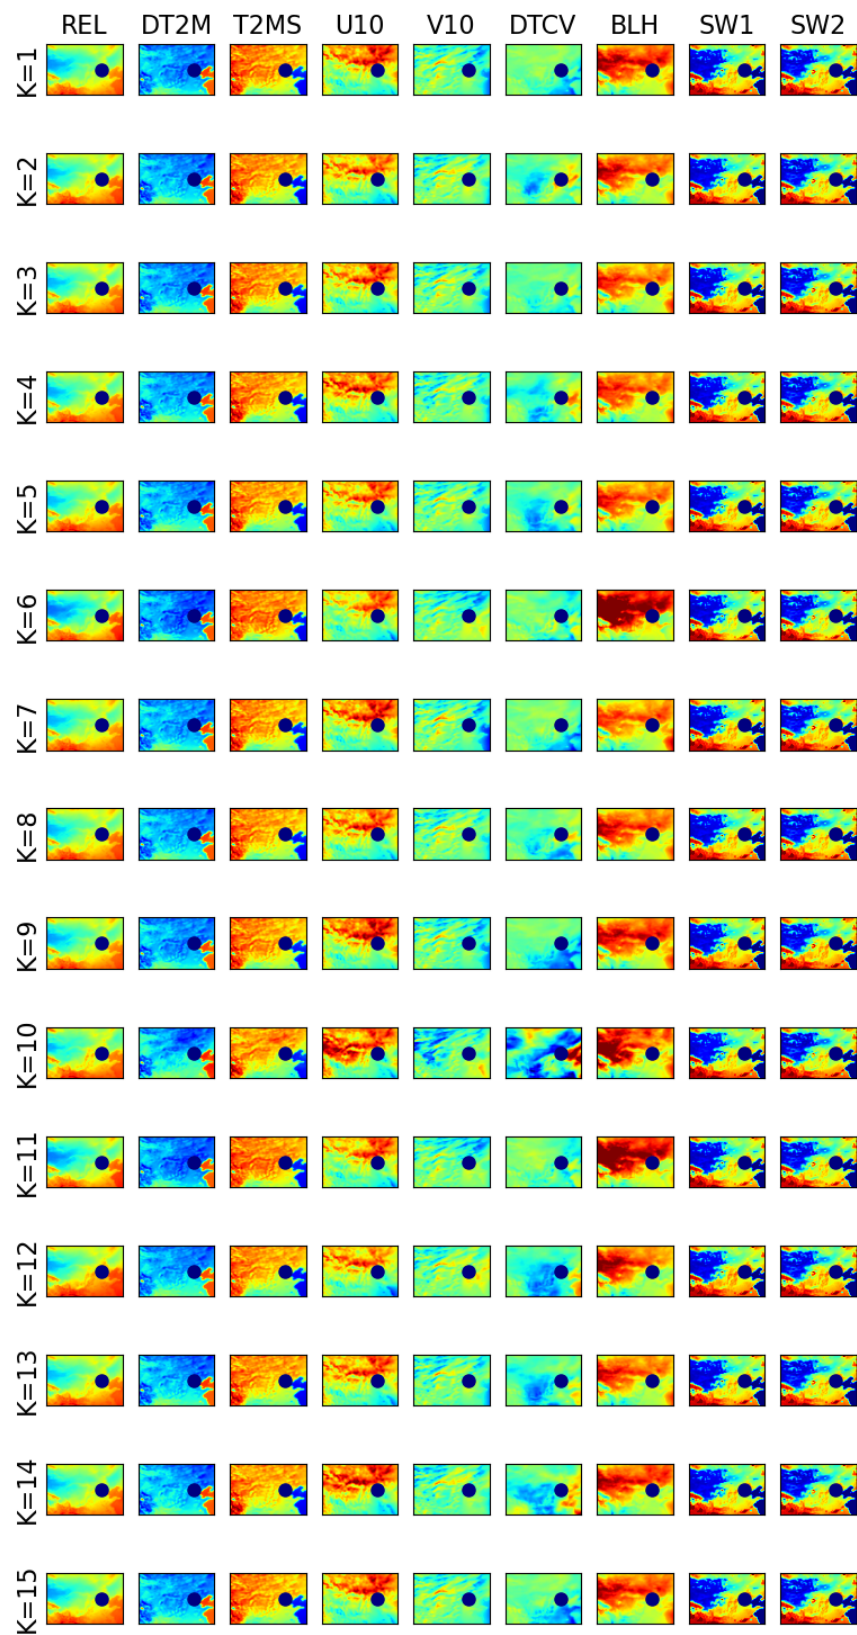

**Figure S8.** Same as Fig. S7 except for 15 TN clusters for Beijing cases.



**Table S1.** The member numbers of various clusters of true positive (TP), false negative (FN), and false positive (FP) outcomes, counted for different months.

|    | JAN | FEB | MAR | APR | MAY | JUN | JUL | AUG | SEP | OCT | NOV | DEC | Total |
|----|-----|-----|-----|-----|-----|-----|-----|-----|-----|-----|-----|-----|-------|
| TP |     |     |     |     |     |     |     |     |     |     |     |     |       |
| 1  | 118 | 65  | 82  | 47  | 33  | 34  | 104 | 65  | 32  | 65  | 96  | 107 | 848   |
| 2  | 31  | 22  | 20  | 10  | 5   | 7   | 19  | 18  | 5   | 10  | 17  | 17  | 181   |
| 3  | 61  | 36  | 36  | 19  | 19  | 10  | 31  | 27  | 7   | 23  | 47  | 38  | 354   |
| 4  | 147 | 88  | 110 | 69  | 47  | 64  | 156 | 102 | 57  | 97  | 131 | 140 | 1208  |
| FN |     |     |     |     |     |     |     |     |     |     |     |     |       |
| 1  | 22  | 28  | 32  | 25  | 23  | 35  | 44  | 46  | 34  | 40  | 36  | 27  | 392   |
| 2  | 3   | 8   | 7   | 9   | 4   | 5   | 12  | 11  | 6   | 8   | 10  | 7   | 90    |
| 3  | 1   | 1   | 4   | 3   | 1   | 2   | 3   | 2   | 1   | 1   | 3   | 4   | 26    |
| FP |     |     |     |     |     |     |     |     |     |     |     |     |       |
| 1  | 11  | 18  | 8   | 7   | 5   | 10  | 14  | 19  | 10  | 9   | 10  | 6   | 127   |
| 2  | 12  | 21  | 9   | 8   | 7   | 11  | 16  | 20  | 12  | 10  | 14  | 6   | 146   |
| 3  | 12  | 21  | 9   | 8   | 7   | 11  | 20  | 22  | 14  | 12  | 14  | 6   | 156   |
| 4  | 10  | 11  | 4   | 3   | 3   | 7   | 10  | 8   | 8   | 7   | 5   | 3   | 79    |
